# Supplementary material
Source: publisher figshare collection journal article supplement (https://acs.figshare.com/ndownloader/files/24581519)
Supplement: Supplementary file 1 [file 24581519]

## Supporting Information

# Enhancement of CO<sub>2</sub> adsorption/desorption properties of solid sorbents using tetraethylenepentamine/diethanolamine blends

Duc Sy Dao,<sup>a,b</sup> Hidetaka Yamada,<sup>b,c</sup> Katsunori Yogo<sup>b,c,\*</sup>

<sup>a</sup> *Faculty of Chemistry, VNU University of Science, Vietnam National University, Hanoi (VNU-Hanoi), 19 Le Thanh Tong, Hoan Kiem, Hanoi 10000, Vietnam*

<sup>b</sup> *Division of Materials Science, Nara Institute of Science and Technology (NAIST), 8916-5 Takayama-cho, Ikoma, Nara 630-0192, Japan*

<sup>c</sup> *Research Institute of Innovative Technology for the Earth (RITE), 9-2 Kizugawadai, Kizugawa, Kyoto 619-0292, Japan*

\*To whom correspondence should be addressed. Tel: +81-774-75-2305; Fax: +81-774-75-2318; E-mail: [yogo@rite.or.jp](mailto:yogo@rite.or.jp) (K. Yogo).

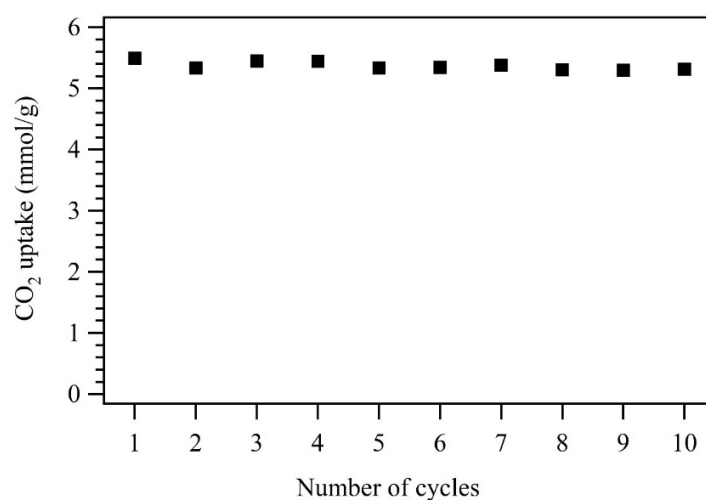

**Figure S1.** CO<sub>2</sub> adsorption–desorption over ten cycles of TEPA40-DEA30/MSU-F after 18-month storage measured using pure CO<sub>2</sub> at 50 °C followed by N<sub>2</sub> sweep at 80°C.

After preparation of TEPA40-DEA30/MSU-F, the obtained dry sorbents were stored in a Laboran screw vial at room temperature for 18 months as in the previous study.<sup>S1</sup> After that, the cyclic CO<sub>2</sub> adsorption–desorption test was conducted by thermal gravimetric analysis using an analyzer (STA 449 F3 Jupiter, Netzsch Gerätebau-GmbH, Selb, Germany). The sorbent was degassed by heating at 80 °C for 6 h under N<sub>2</sub> flow at a flow rate of 50 mL/min. Then, the sorbent was cooled to 50 °C for the adoption process with pure CO<sub>2</sub> followed by the desorption at 80 °C for 50 min with a N<sub>2</sub> sweep. The adsorption capacity of fresh TEPA40-DEA30/MSU-F was 5.9 mmol/g at 100 kPa CO<sub>2</sub> and 50 °C.<sup>S2</sup> The result in this figure indicated that the CO<sub>2</sub> uptake was reduced to approximately 5.4 mmol/g during the long-term storage due to the oxidative degradation, as discussed in a previous study.<sup>S1</sup> However, it was also demonstrated that the CO<sub>2</sub> adsorption–desorption performance can be maintained still stable.

**Table S1.** Comparison of adsorption capacity of several amine solid sorbents at the CO<sub>2</sub> partial pressure of 10 kPa

| Support            | Amine                 | Temperature (°C) |            | Capacity (mmol/g) | Ref.      |
|--------------------|-----------------------|------------------|------------|-------------------|-----------|
|                    |                       | Adsorption       | Desorption |                   |           |
| MSU-F              | TEPA-DEA              | 40               | 80         | 5.2               | This work |
| MPS                | Linear poly-L-alanine | 50               | 110        | 3.9               | S3        |
| SBA-15             | TEPA                  | 75               | 105        | 3.5               | S4        |
| Fly ash extraction | PEI                   | 75               | 100        | 3.0               | S5,6      |
| Silica gel         | PEI-piperazine        | 75               | 100        | 3.2               | S7        |

MPS: three-dimensional interconnected macroporous silica; SBA-15: Santa Barbara Amorphous-15; The comparison was based on the review by Dutcher et al.<sup>S8</sup>

## References

- (S1) Vu, Q. T.; Yamada, H.; Yogo, K. Inhibitors of oxidative degradation of polyamine-modified silica sorbents for CO<sub>2</sub> capture. *Ind. Eng. Chem. Res.* **2019**, *58*, 15598–15605.
- (S2) Dao, D. S.; Yamada, H.; Yogo, K. Large-pore mesostructured silica impregnated with blended amines for CO<sub>2</sub> capture. *Ind. Eng. Chem. Res.* **2013**, *52*, 13810–13817.
- (S3) Liu, F.-Q.; Wang, L.; Huang, Z.-G.; Li, C.-Q.; Li, W.; Li, R.-X.; Li, W.-H. Amine-tethered adsorbents based on three-dimensional macroporous silica for CO<sub>2</sub> capture from simulated flue gas and air. *ACS Appl. Mater. Interfaces* **2014**, *6*, 4371–4381.
- (S4) Zhao, A.; Samanta, A.; Sarkar, P.; Gupta, R. Carbon dioxide adsorption on amine-impregnated mesoporous SBA-15 sorbents: experimental and kinetics study. *Ind. Eng. Chem. Res.* **2013**, *52*, 6480–6491.
- (S5) Zhang, Z.; Wang, B.; Sun, Q.; Zheng, L. A Novel method for the preparation of CO<sub>2</sub> sorption sorbents with high performance. *Appl. Energy* **2014**, *123*, 179–184.
- (S6) Zhang, Z.; Wang, B.; Sun, Q. Fly Ash-derived solid amine sorbents for CO<sub>2</sub> capture from flue gas. *Energy Procedia* **2014**, *63*, 2367–2373.
- (S7) Zhang, Z.; Wang, B.; Sun, Q.; Ma, X. Enhancing sorption performance of solid amine sorbents for CO<sub>2</sub> capture by additives. *Energy Procedia* **2013**, *37*, 205–210.
- (S8) Dutcher, B.; Fan, M.; Russell, A. G. Amine-based CO<sub>2</sub> capture technology development from the beginning of 2013 – a review. *ACS Appl. Mater. Interfaces.* **2015**, *7*, 2137–2148.
